# Supplementary material
Source: PubMed Central journal article supplement (PMC3116741)
Supplement: supp_bhq237_cercor-2010-00341-File005.pdf [file supp_bhq237_cercor-2010-00341-File005.pdf]

# Anxiety dissociates dorsal and ventral medial prefrontal cortex functional connectivity with the amygdala at rest

M. Justin Kim, Dylan G. Gee, Rebecca A. Loucks, F. Caroline Davis, & Paul J. Whalen

Supplementary Table 1. Resting state functional connectivity of the right amygdala

| Brain Regions             | Cluster Size (mm <sup>3</sup> ) | MNI Coordinates |          |          |          |
|---------------------------|---------------------------------|-----------------|----------|----------|----------|
|                           |                                 | <i>x</i>        | <i>y</i> | <i>z</i> | <i>Z</i> |
| POSITIVE                  |                                 |                 |          |          |          |
| R Amygdala                | 348,744                         | 22              | -6       | -18      | 8.26     |
| R Hippocampus             |                                 | 26              | -10      | -28      | 7.31     |
| R Putamen                 |                                 | 28              | 8        | 2        | 7.07     |
| L Hippocampus             |                                 | -20             | -8       | -22      | 7.02     |
| NEGATIVE                  |                                 |                 |          |          |          |
| R Precuneus               | 282,464                         | 6               | -72      | 52       | 5.71     |
| L Precuneus               |                                 | -4              | -56      | 66       | 5.67     |
| R Angular gyrus           |                                 | 48              | -54      | -36      | 5.35     |
| R Cerebellum              |                                 | 8               | -84      | -20      | 5.28     |
| L Inferior temporal gyrus | 7,600                           | -56             | -38      | -22      | 5.01     |
| L Middle temporal gyrus   |                                 | -60             | -34      | -18      | 4.76     |

Supplementary Table 2. Resting state functional connectivity of the left amygdala

| Brain Regions              | Cluster Size (mm <sup>3</sup> ) | MNI Coordinates |          |          |          |
|----------------------------|---------------------------------|-----------------|----------|----------|----------|
|                            |                                 | <i>x</i>        | <i>y</i> | <i>z</i> | <i>Z</i> |
| POSITIVE                   |                                 |                 |          |          |          |
| L Amygdala                 | 265,232                         | -26             | -6       | -20      | 7.91     |
| L Putamen                  |                                 | -24             | 8        | -6       | 6.27     |
| R Amygdala                 |                                 | 24              | 0        | -20      | 6.26     |
| R Hippocampus              |                                 | 22              | -10      | -20      | 6.11     |
| L Anterior cingulate gyrus | 23,576                          | -6              | 16       | 28       | 5.2      |
| R Anterior cingulate gyrus |                                 | 8               | 4        | 46       | 5.11     |
| L Medial frontal gyrus     |                                 | -4              | -2       | 56       | 3.98     |
| R Medial frontal gyrus     |                                 | 6               | -20      | 58       | 3.96     |
| NEGATIVE                   |                                 |                 |          |          |          |
| R Precuneus                | 102,920                         | 4               | -76      | 58       | 6.29     |
| L Precuneus                |                                 | -2              | -82      | 42       | 5.47     |
| R Cerebellum               | 44,328                          | 48              | -72      | -34      | 5.02     |
| L Cerebellum               |                                 | -16             | -82      | -28      | 4.71     |
| R Middle frontal gyrus     | 42,600                          | 28              | 20       | 56       | 5.38     |
| R Superior frontal gyrus   |                                 | 20              | 30       | 40       | 4.67     |
| R Middle temporal gyrus    | 5,000                           | 52              | -54      | -4       | 3.76     |
| R Angular gyrus            |                                 | 56              | -56      | 22       | 3.68     |
| R Inferior temporal gyrus  |                                 | 54              | -40      | -18      | 3.1      |

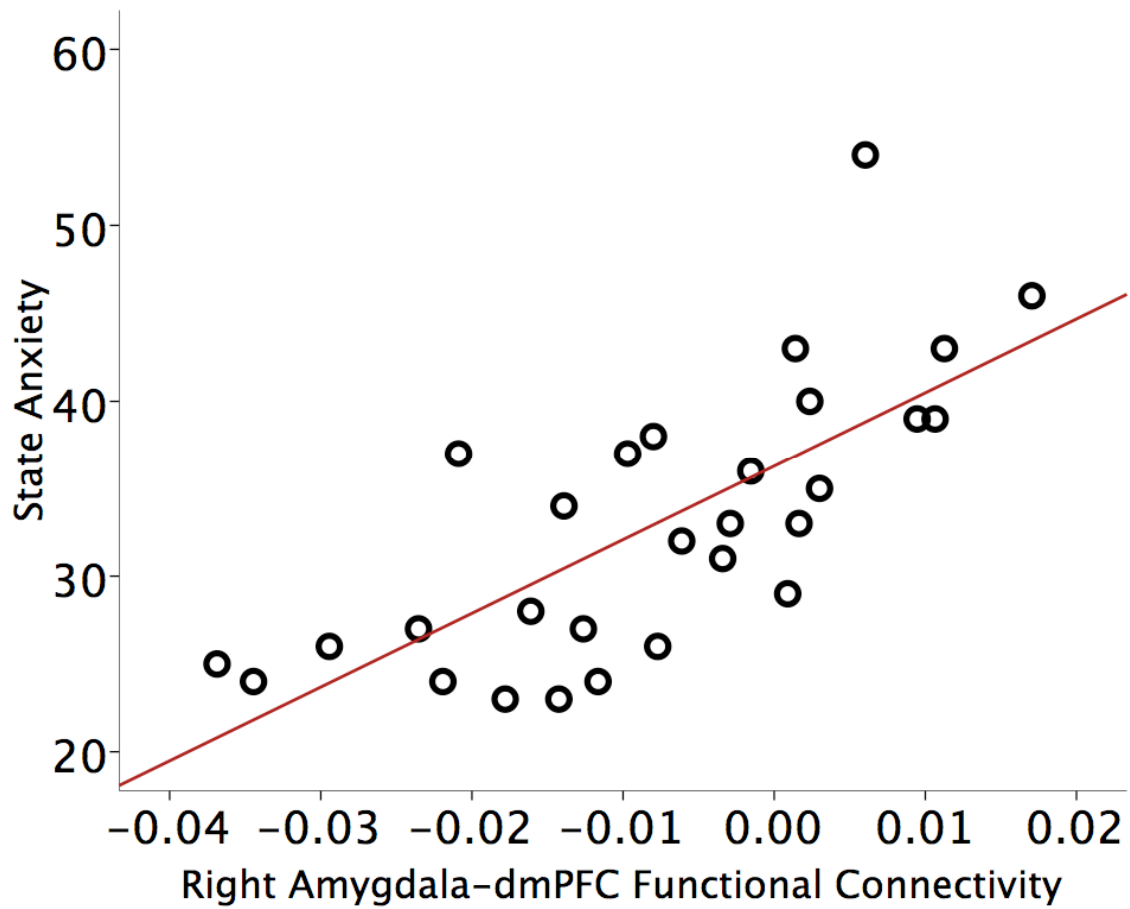

Supplementary Figure 1. Scatterplot showing a positive correlation between right amygdala-dmPFC functional connectivity and state anxiety ( $r=0.736$ ,  $p<0.001$ ). Functional connectivity values are taken from the dmPFC voxel cluster defined in Figure 2. We note that this scatterplot was presented only for visual purposes.

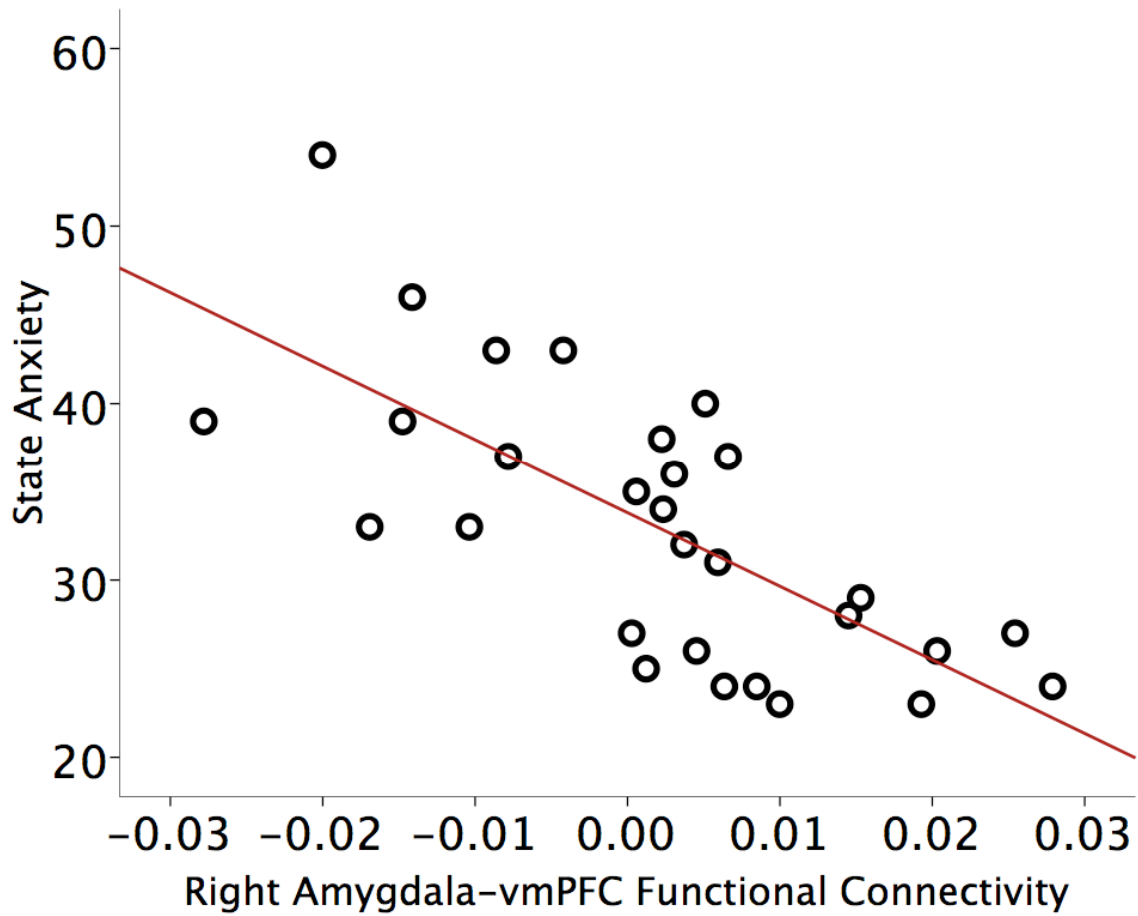

Supplementary Figure 2. Scatterplot showing a negative correlation between right amygdala-vmPFC functional connectivity and state anxiety ( $r=-0.71$ ,  $p<0.001$ ). Functional connectivity values are taken from the vmPFC voxel cluster defined in Figure 2. We note that this scatterplot was presented only for visual purposes.
